# Supplementary material
Source: publisher figshare collection journal article supplement (https://tandf.figshare.com/ndownloader/files/16753412)
Supplement: Supplementary file 1 [file 16753412]

**Supplemental Material**

Catalytic C-C cross coupling and hydrogen evolution by two Pd(II)-complexes of di-2-pyridyl ketone benzoyl hydrazones

MOHAMMED BAKIR*, MARK W. LAWRENCE, PETER NELSON and M BOHARI YAMIN

Table S1. Selected bond lengths and angles for **3**.

| Bond | Bond lengths [Å] | Angle | Bond angles [°] |
| --- | --- | --- | --- |
| Pd(1)-N(1) | 2.003(4) | N(3)-Pd(1)-N(1) | 80.93(15) |
| Pd(1)-N(3) | 1.940(3) | N(3)-Pd(1)-O(1) | 80.58(13) |
| Pd(1)-O(1) | 2.018(3) | N(3)-Pd(1)-Cl(1) | 178.38(10) |
| Pd(1)-Cl(1) | 2.3181(13) | N(1)-Pd(1)-Cl(1) | 98.53(12) |
| N(3)-C(1) | 1.253(5) | O(1)-Pd(1)-Cl(1) | 99.97(9) |
| N(3)-N(4) | 1.372(5) | C(1)-N(3)-N(4) | 126.0(4) |
| N(4)-C(2) | 1.337(5) | C(1)-N(3)-Pd(1) | 118.4(3) |
| O(1)-C(2) | 1.297(5) | N(4)-N(3)-Pd(1) | 115.2(3) |
| O(2)-C(5) | 1.226(7) | C(2)-N(4)-N(3) | 111.5(4) |
| C(2)-C(31) | 1.456(6) | C(2)-O(1)-Pd(1) | 108.9(2) |
| N(6)-C(4) | 1.453(7) | O(1)-C(2)-N(4) | 124.1(4) |
| N(6)-C(5) | 1.309(7) |  |  |

Table S2. Refined hydrogen bonds in 3 [Å and °]

| D-H...A | d(D-H) | d(H...A) | d(D...A) | <(DHA) | Symmetry transformation |
| --- | --- | --- | --- | --- | --- |
| O(3)-H(3WA)...O(2) | 0.87(7) | 2.04(8) | 2.862(10) | 157(9) |  |
| O(3)-H(3WB)...Cl(1) | 0.86(8) | 2.77(7) | 3.517(9) | 146(8) | [x,y,1+z] |
| N(5)-H(5B)...O(2) | 0.857(10) | 2.194(15) | 3.045(7) | 171(6) | [x, y-1, z-1] |

Figure S1. A view of the extended structure of [PdCl(κ3-Npy,Nim,O-dpk-4-abh-H)]·H2O·dmf.

Figure S2. Infrared spectra of neat solids of **1**, dpkbh, **2** and dpk-4-abh.

Figure S3. 1H NMR spectra of **2** in d7-dmf and d6-dmso at 303 K.


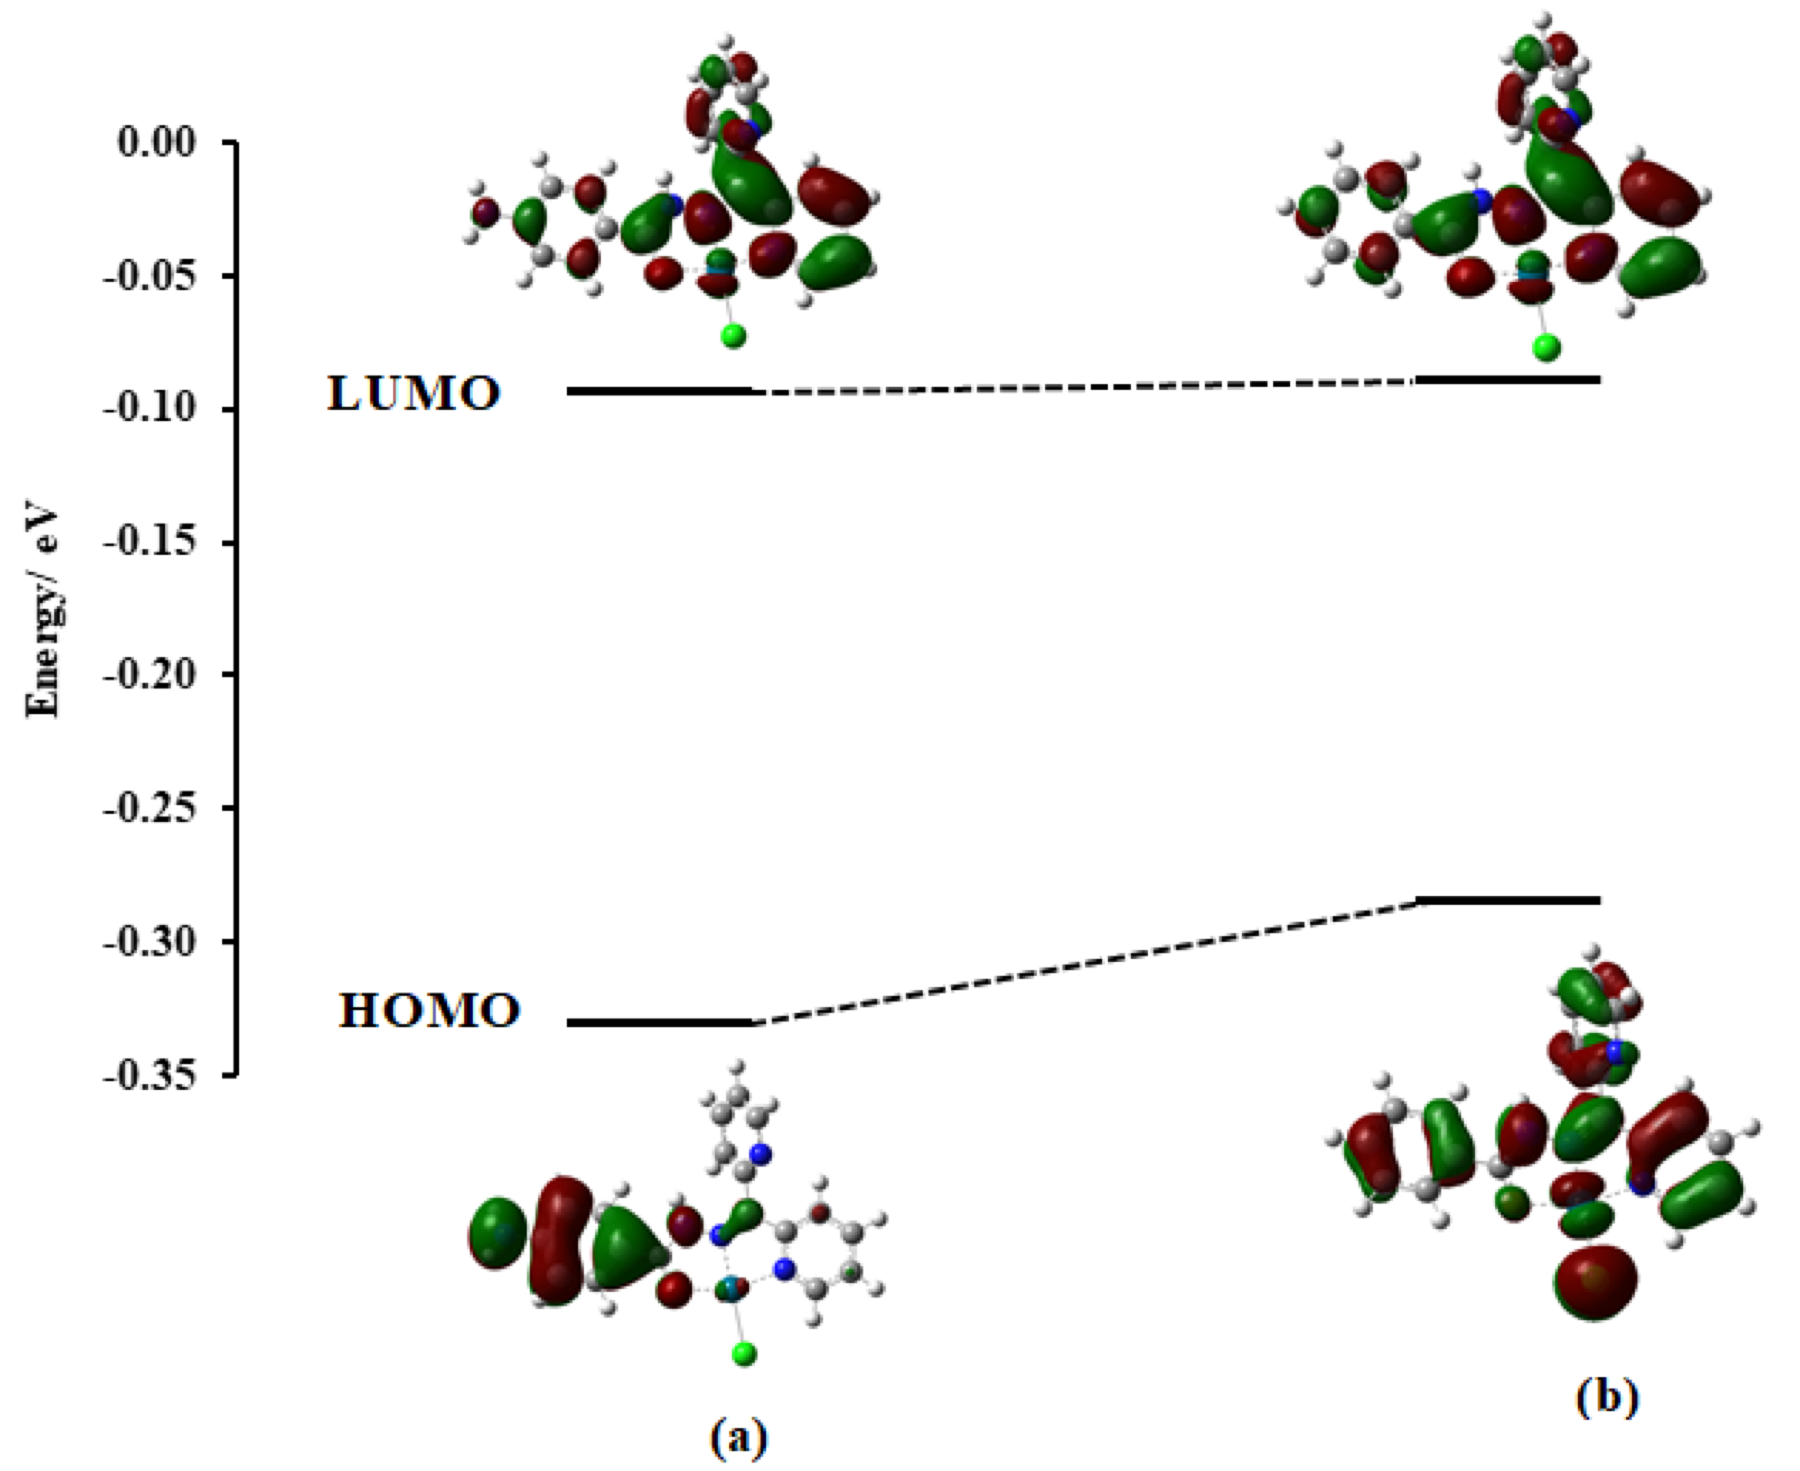


Figure S4. Calculated HOMO-LUMO energy gap and surfaces of **2** (a) and **1** (b).

Figure S5. Electronic absorption spectra of **2** measured in dmso (3.15×10-5 M) and dmf (4.76×10‑5 M) along with the spectra of uncoordinated dpk-4-abh in dmso (1.80×10-5 M).

Figure S6. Cyclic voltammograms of **1** in the presence of *p*-toluenesulfonic acid monohydrate (*p*‑TSOH) (a) 0 mM, (b) 8, (c) 15, (d) 25, (e) 35, and (f) 40 mM at a glassy carbon working electrode in DMF. [**1**] = 1.9 mM, supporting electrolyte = 0.1 M [*n*Bu4N]PF6, scan rate = 200 mV s‑1.

**1H- and 13C-NMR spectral data for C-C cross coupling products**

1. **4-acetyl-1,1′-biphenyl**

The compound was isolated as a white solid. The spectral data were in agreement with the literature. **1H NMR** (500 MHz, CDCl3): *δ* 8.02-8.01 [s, 2H]; 7.67-7.61 [m, 4H]; 7.46-7.39 [m, 3H]; 2.62 [s, 3H]. **13C NMR** (500 MHz, CDCl3): ** (ppm) 197.8, 145.8, 139.9, 135.8, 129.0, 128.3, 127.3, 127.3, 26.7.

**2. 1-phenylnaphthalene**

The compound was isolated as a low melting solid (produced a very pale yellow liquid upon melting). **1H NMR** (500 MHz, CDCl3): *δ* 7.94-7.65 [m, 2 H]; 7.65-7.60 [m, 3 H], 7.57-7.37 [m, 5 H]. **13C NMR** (500 MHz, CDCl3): ** (ppm) 140.8, 139.9, 133.6, 131.5, 130.0, 128.3, 127.6, 127.3, 126.7, 126.0, 125.7, 125.5, 124.2.

**3. 1-Bromonaphthalene**

1-Bromonaphthalene was purchased as a yellow-brown liquid. **1H NMR** (500 MHz, CDCl3): *δ* 8.19 [d, 1H] 7.73 [t, 1 H]; 7.71-7.44 [m, 4 H], 7.21[t, 1 H].
